# Supplementary material for: A general acetic acid vapour etching strategy to synthesize layered carbon nitride with carbon vacancies for efficient photoredox catalysis
Source: Royal Society of Chemistry journal article supplement (doi:10.1039/d2ta04279g), 2022-01-01
Supplement: d2ta04279g1.pdf [file d2ta04279g1.pdf]

SI

**A general acetic acid vapour etching strategy to synthesize  
layered carbon nitride with carbon vacancies for efficient  
photoredox catalysis**

Jianghong Zhao<sup>1\*</sup>, Rihui Mu<sup>1</sup>, Ya Zhang<sup>2</sup>, Zhidong Yang<sup>2</sup>, Hongxia Zhang<sup>2</sup>, Hu  
Shi<sup>2,3\*</sup>, Min Zhang<sup>2</sup>, Zhanfeng Zheng<sup>4</sup>, and Pengju Yang<sup>2,4\*</sup>

<sup>1</sup>Engineering Research Center of Ministry of Education for Fine Chemicals, Shanxi  
University, Taiyuan 030006, China

<sup>2</sup>School of Chemistry and Chemical Engineering, Shanxi University, Taiyuan 030006,  
China

<sup>3</sup>Institute of Molecular Science, Shanxi University, Taiyuan 030006, China

<sup>4</sup>State Key Laboratory of Coal Conversion, Institute of Coal Chemistry, Chinese  
Academy of Sciences, Taiyuan 030001, China

## Contents:

**Figure S1.** Result of the edge layer number of PCN nanosheets by TEM analysis.

**Figure S2.** Mass spectrometry analysis of (a) acetic acid decomposition and (b) acetic acid decomposition in presence of PCN.

**Figure S3.** The bond lengths of C/N and C=N bonds within PCN.

**Figure S4.** FTIR spectra of PCN and PCN nanosheets.

**Figure S5.** (a) Charge density difference and (b) Bader charge analysis of Pt/PCN. The cyan and yellow indicate the regions of charge loss and gain, respectively.

**Figure S6.** TEM images of Pt/PCN (a) and Pt/PCN nanosheets (b) (inset is the HRTEM images of Pt nanoparticles).

**Figure S7.** Optimized geometric structures of (a) Pt/PCN-H\* and (b) Pt/PCN-CVs-H\* by DFT simulation.

**Figure S8.** Cycling experiments of PCN nanosheets toward phenol degradation.

**Figure S9.** TEM images of PCN-T and PCN-D.

**Figure S10.** Nitrogen adsorption–desorption isotherms of PCN-T and PCN-T nanosheets.

**Figure S11.** Nitrogen adsorption–desorption isotherms of PCN-D and PCN-D nanosheets.

**Figure S12.** (a) C 1s and (b) N 1s of PCN-T and PCN-T nanosheets.

**Figure S13.** (a) C 1s and (b) N 1s of PCN-D and PCN-D nanosheets.

**Figure S14.** UV–vis spectra of PCN-T and PCN-T nanosheets.

**Figure S15.** UV–vis spectra of PCN-D and PCN-D nanosheets.

**Figure S16.** FTIR spectra of PCN-T and PCN-T nanosheets.

**Figure S17.** FTIR spectra of PCN-D and PCN-D nanosheets.

**Figure S18.** Transient photocurrent density of PCN-T and PCN-T nanosheets.

**Figure S19.** Transient photocurrent density of PCN-D and PCN-D nanosheets.

**Figure S20.** Electrochemical impedance spectra of PCN-T and PCN-T nanosheets.

**Figure S21.** Electrochemical impedance spectra of PCN-D and PCN-D nanosheets.

**Figure S22.** Band gap energies of PCN-T and PCN-T nanosheets.

**Figure S23.** Band gap energies of PCN-D and PCN-D nanosheets.

**Figure S24.** Mott–Schottky plots of (a) PCN-T and (b) PCN-T nanosheets. (c) Band alignments

of PCN-T and PCN-T nanosheets.

**Figure S25.** Mott–Schottky plots of (a) PCN-D and (b) PCN-D nanosheets. (c) Band alignments of PCN-D and PCN-D nanosheets.

**Figure S26.** Comparison of the degradation rates of PCN-T and PCN-T nanosheets.

**Figure S27.** Comparison of the degradation rates of PCN-D and PCN-D nanosheets.

**Table S1.** The BET data of all samples.

**Table S2.** The atom percentage of C, N and O atoms in the PCN and PCN nanosheets samples determined by XPS.

**Table S3.** The peaks area ratios of C-N=C/H-N=C, N-(C)<sub>3</sub> and C-NH<sub>x</sub> of PCN and PCN nanosheets.

**Table S4.** The atom percentage of C, N, O and H atoms in the PCN and PCN nanosheets samples determined by EA.

**Table S5.** Comparison of typical PCN photocatalysts reported for hydrogen production and the corresponding quantum yields.

**Table S6.** Bader charge analysis located in the Pt/PCN interface. The value was obtained by the difference between the number of valence electrons and calculated Bader charge results for each atom. The positive and negative values stand for, respectively, electron loss and accumulation. The net electronic charges transferred from the PCN to the Pt are -0.296 |e|.

**Table S7.** Bader charge analysis located in the Pt/PCN-CVs interface. The value was obtained by the difference between the number of valence electrons and calculated Bader charge results for each atom. The positive and negative values stand for, respectively, electron loss and accumulation. The net electronic charges transferred from the PCN-CVs to the Pt are -0.44 |e|.

**Table S8.** Free energy corrections for various reaction species

**Table S9.** Bader charge transfer of atoms located in the O<sub>2</sub>/PCN interface. The value was obtained by the difference between the number of valence electrons and calculated Bader charge results for each atom. The net electronic charges transferred from the PCN interface to the O<sub>2</sub> are -2.01 |e|.

**Table S10.** Bader charge transfer of atoms located in the O<sub>2</sub>/PCN-CVs interface. The value was obtained by the difference between the number of valence electrons and calculated Bader charge results for each atom. The net electronic charges transferred from the PCN nanosheets interface to the O<sub>2</sub> are -2.476 |e|.

**Table S11.** The atom percentage of C, N and O atoms in the PCN-T, PCN-T nanosheets, PCN-D

and PCN-D nanosheets samples determined by XPS.

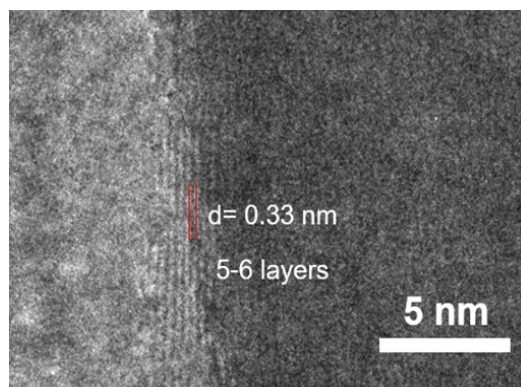

**Figure S1.** Result of the edge layer number of PCN nanosheets by TEM analysis.

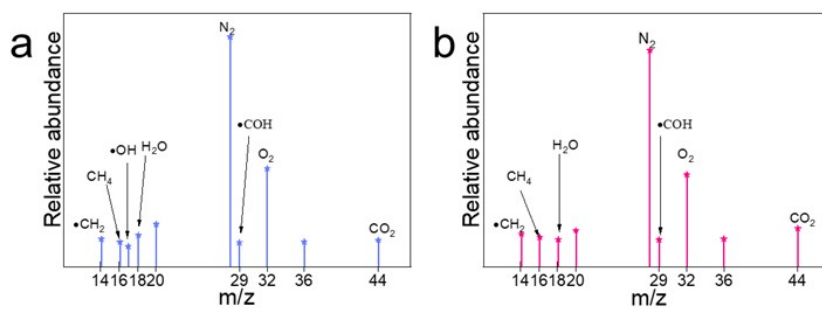

**Figure S2.** Mass spectrometry analysis of acetic acid decomposition (a) and acetic acid decomposition in presence of PCN (b).

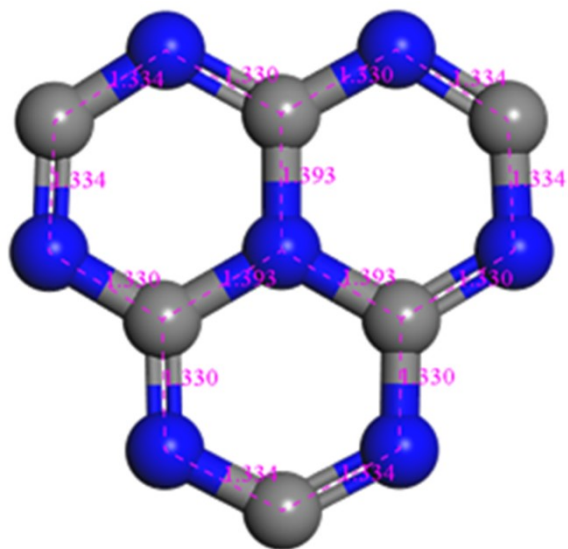

**Figure S3.** The bond lengths of C/N and C=N bonds within PCN.

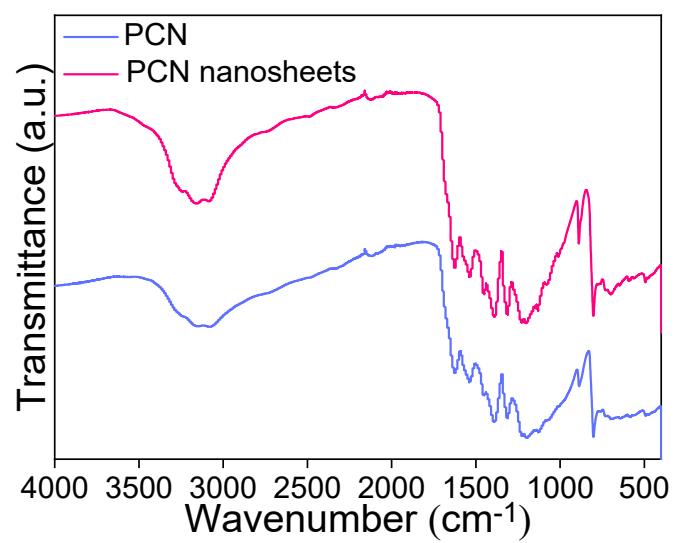

**Figure S4.** FTIR spectra of PCN and PCN nanosheets.

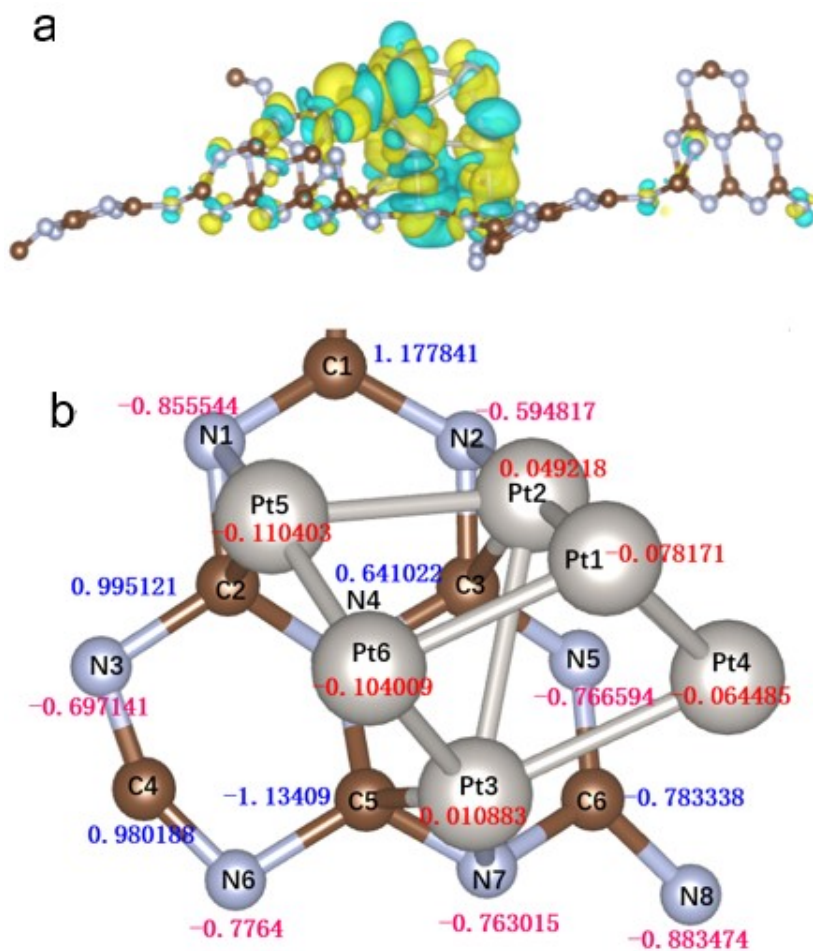

**Figure S5.** (a) Charge density difference and (b) Bader charge analysis of Pt/PCN. The cyan and yellow indicate the regions of charge loss and gain, respectively.



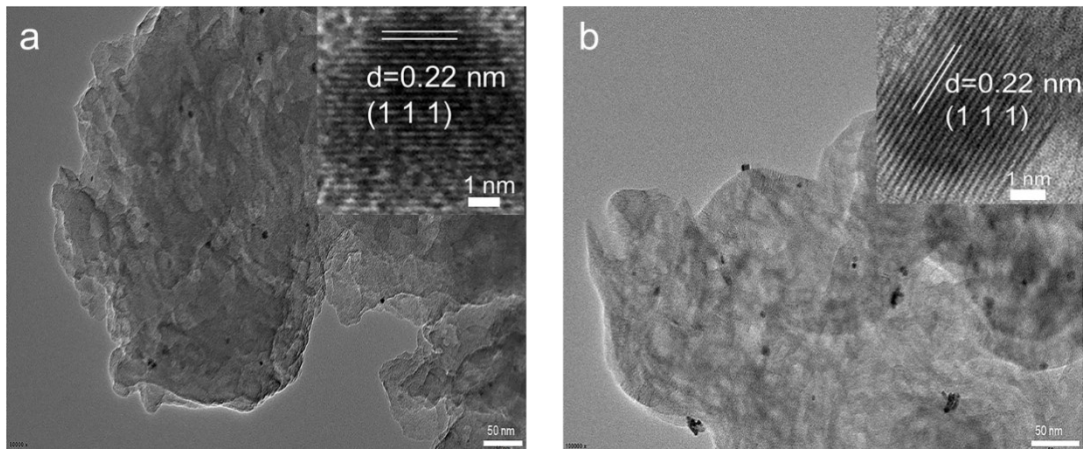

**Figure S6.** TEM images of Pt/PCN (a) and Pt/PCN nanosheets (b) (inset is the HRTEM images of Pt nanoparticles).

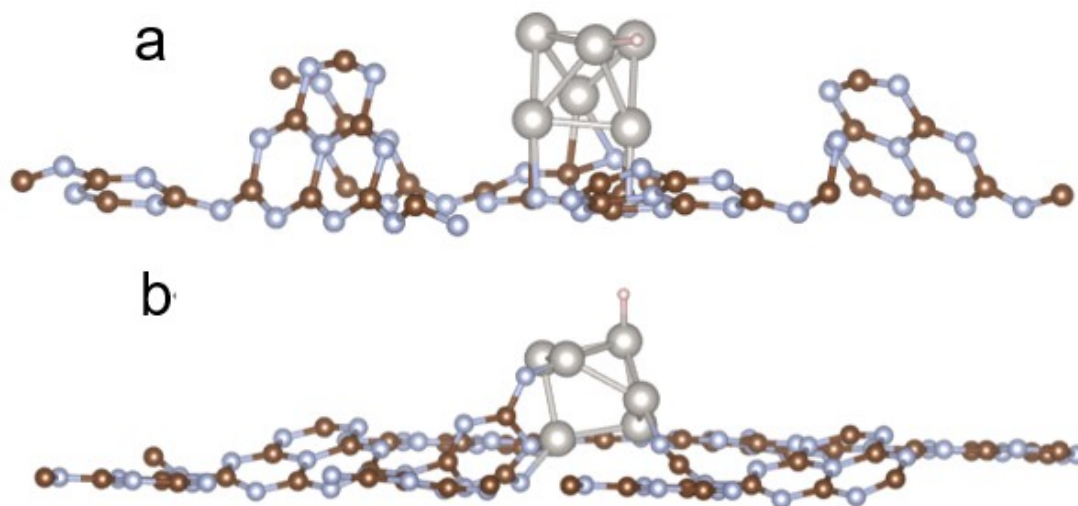

**Figure S7.** Optimized geometric structures of (a) Pt/PCN-H\*, (b) Pt/PCN-CVs-H\* by DFT simulation.

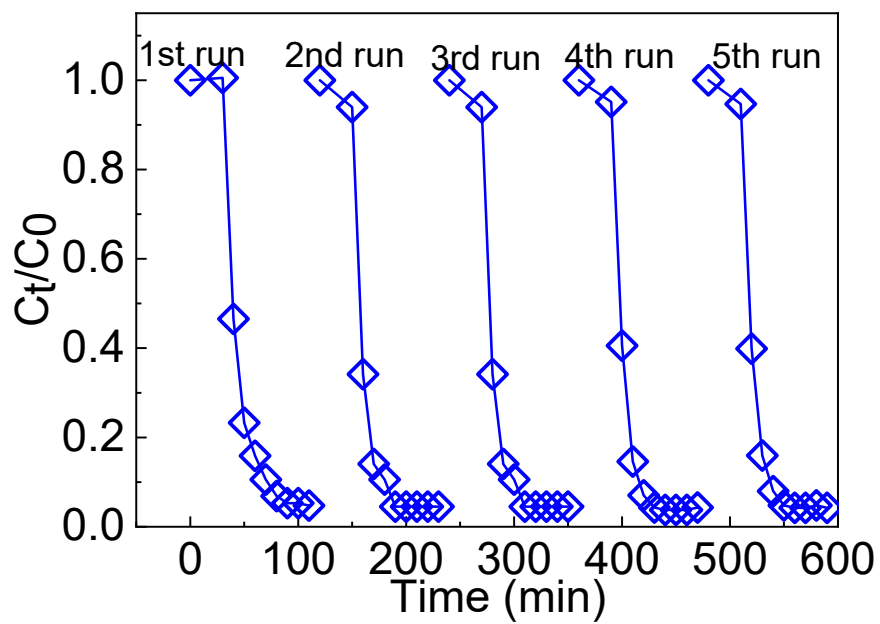

**Figure S8.** Cycling experiments of PCN nanosheets toward phenol degradation.

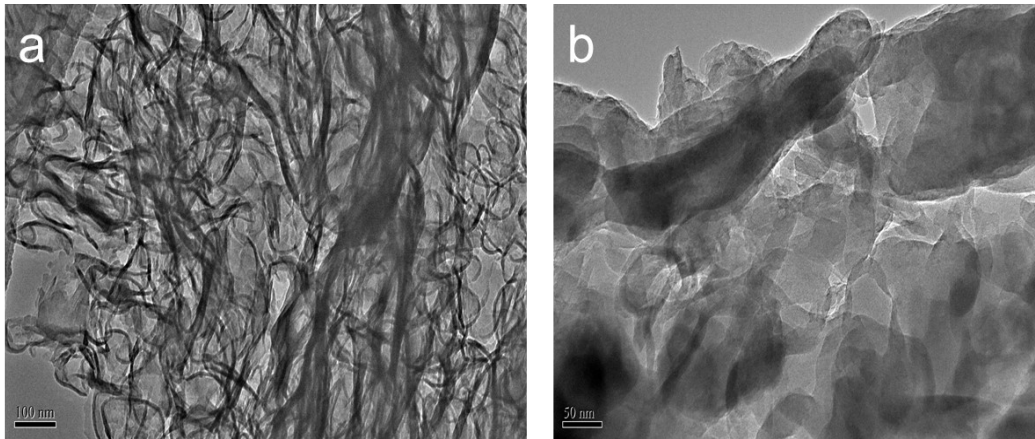

**Figure S9.** TEM images of PCN-T and PCN-D.

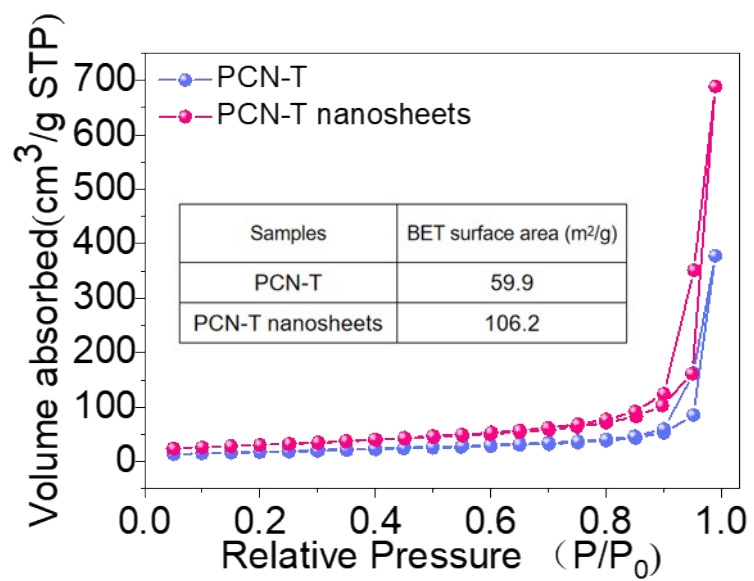

**Figure S10.** Nitrogen adsorption–desorption isotherms of PCN-T and PCN-T nanosheets.

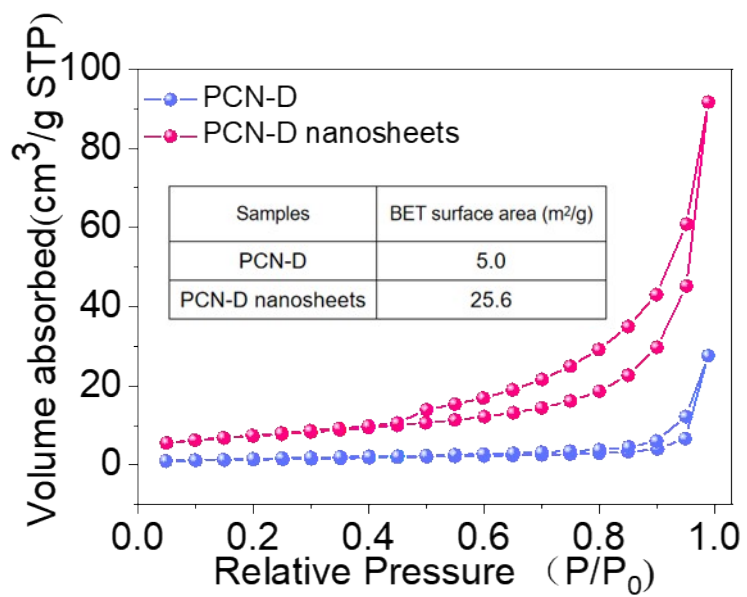

**Figure S11.** Nitrogen adsorption–desorption isotherms of PCN-D and PCN-D nanosheets.

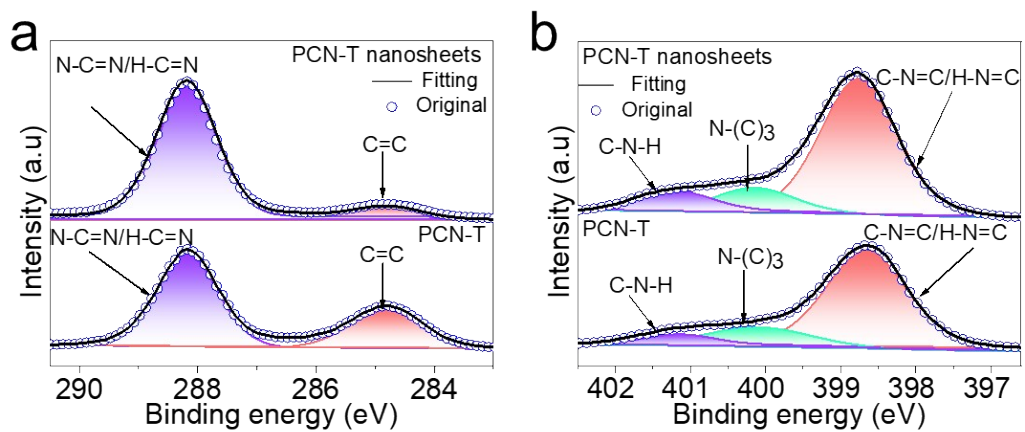

**Figure S12.** (a) C 1s and (b) N 1s of PCN-T and PCN-T nanosheets.

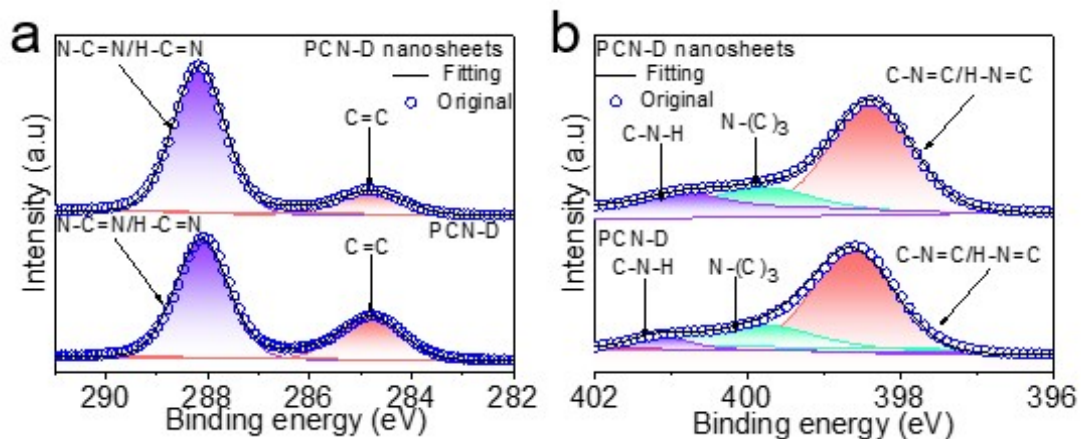

**Figure S13.** (a) C 1s and (b) N 1s of PCN-D and PCN-D nanosheets.



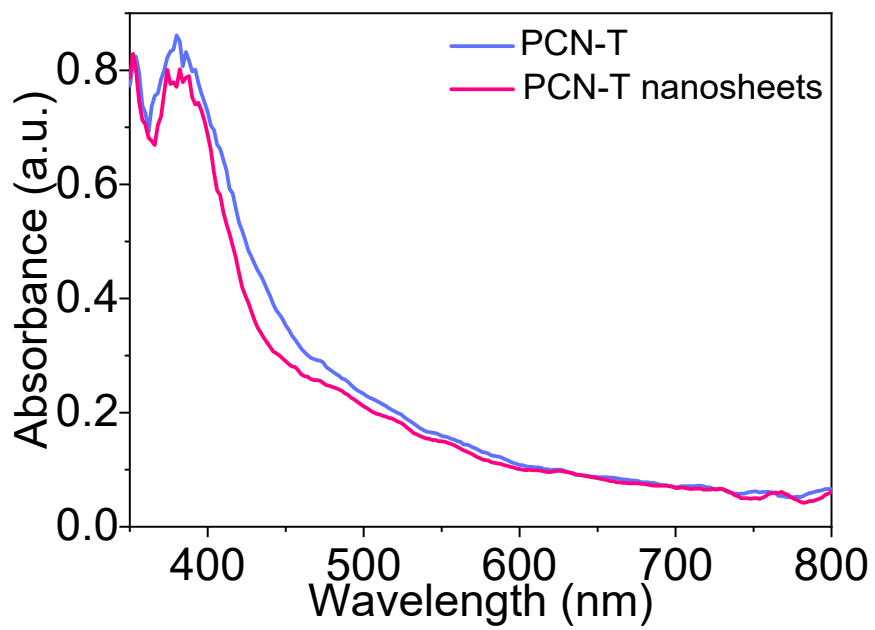

**Figure S14.** UV-vis spectra of PCN-T and PCN-T nanosheets.

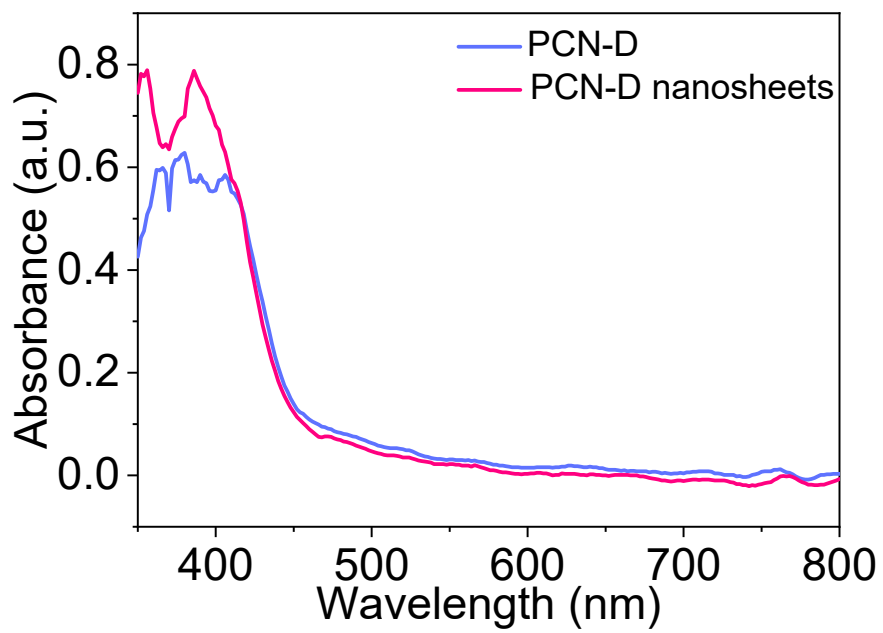

**Figure S15.** UV-vis spectra of PCN-D and PCN-D nanosheets.

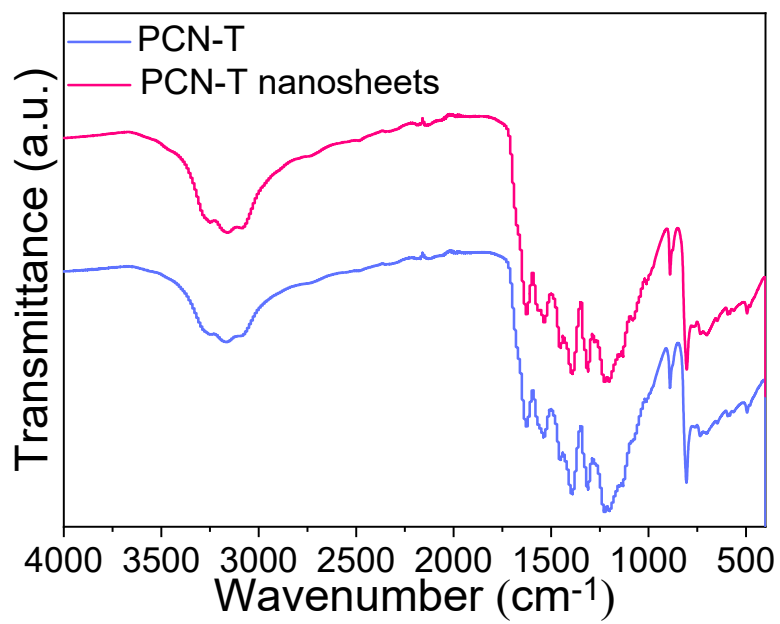

**Figure S16.** FTIR spectra of PCN-T and PCN-T nanosheets.

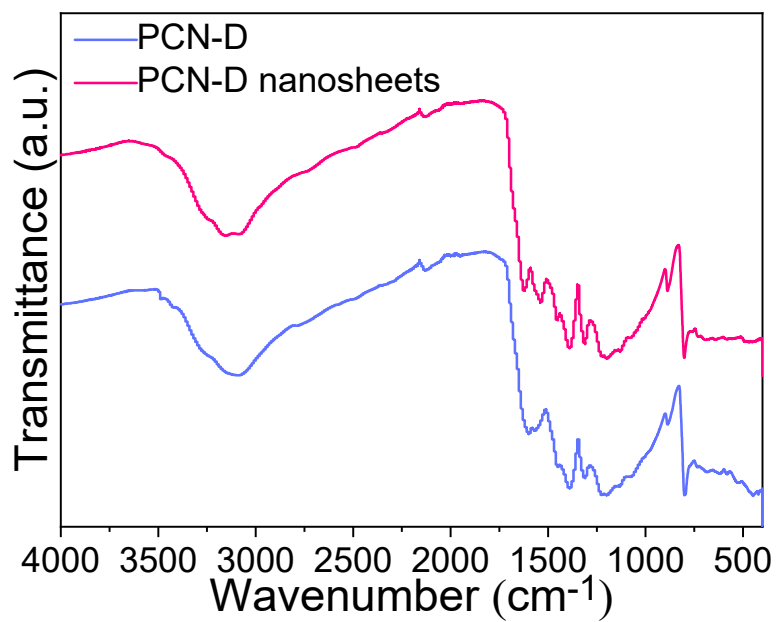

**Figure S17.** FTIR spectra of PCN-D and PCN-D nanosheets.

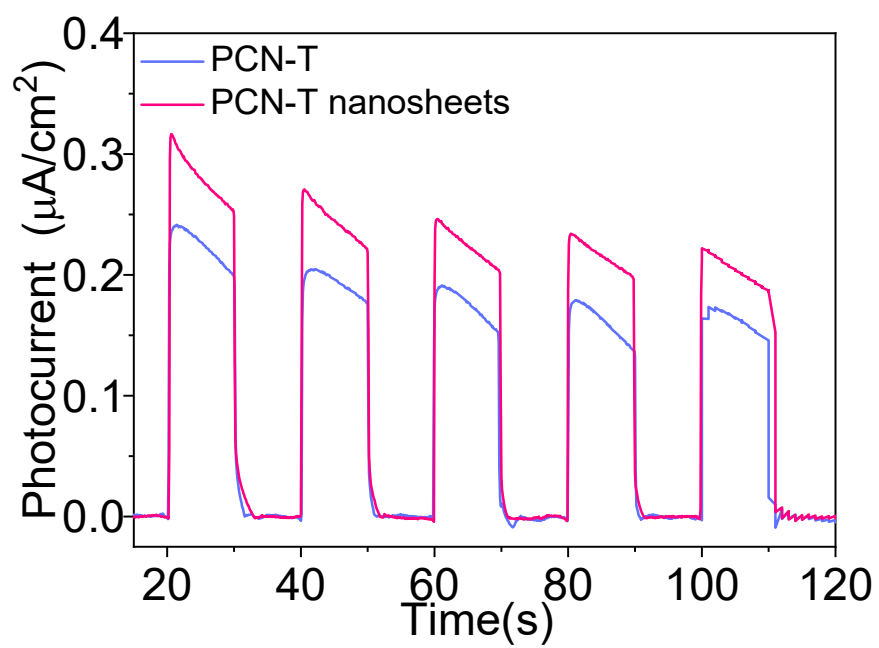

**Figure S18.** Transient photocurrent density of PCN-T and PCN-T nanosheets under 420 nm.

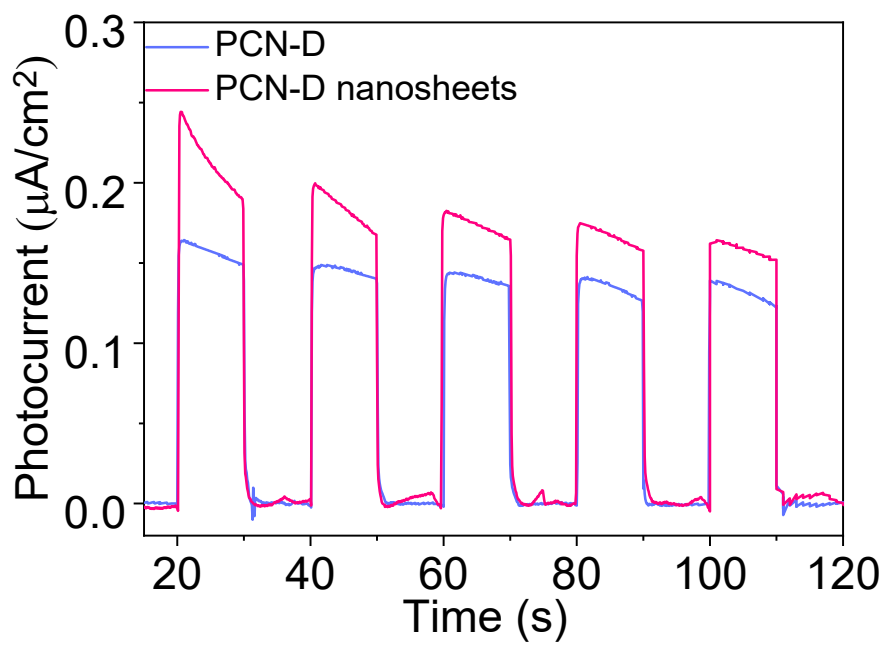

**Figure S19.** Transient photocurrent density PCN-D and PCN-D nanosheets under 420 nm.

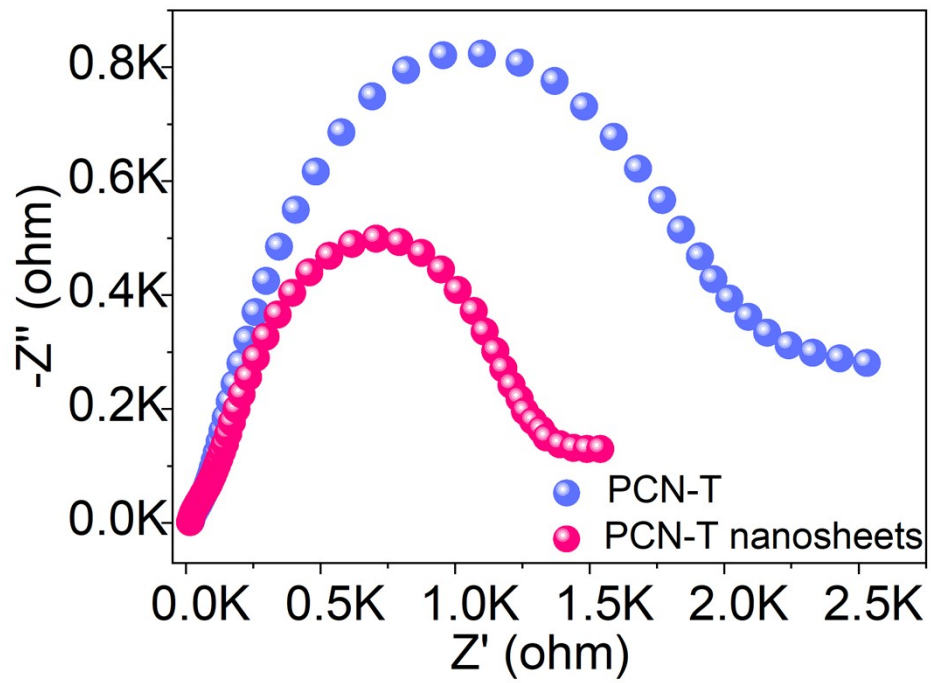

**Figure S20.** Electrochemical impedance spectra of PCN-T and PCN-T nanosheets.

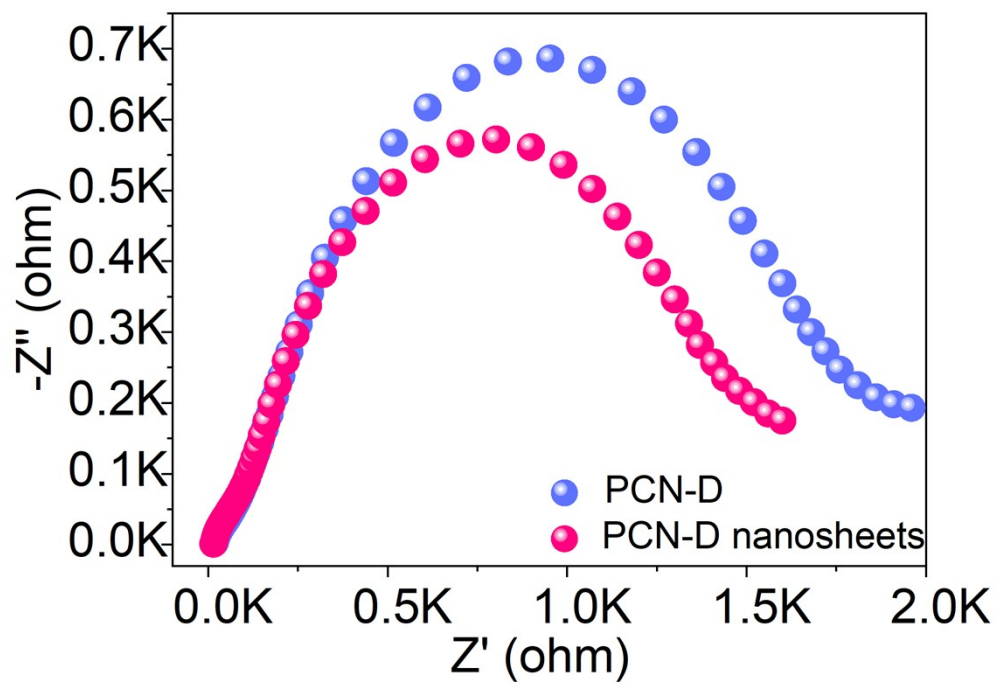

**Figure S21.** Electrochemical impedance spectra of PCN-D and PCN-D nanosheets.



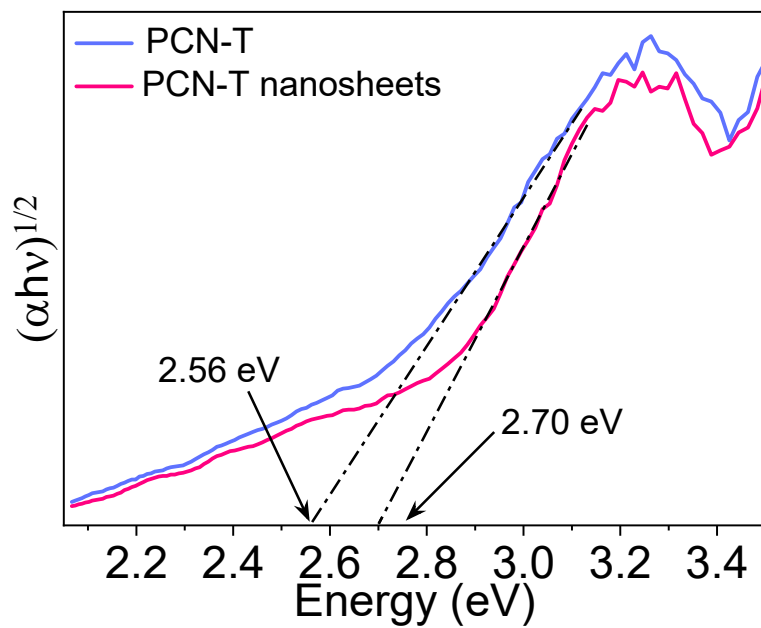

**Figure S22.** Band gap energies of PCN-T and PCN-T nanosheets.

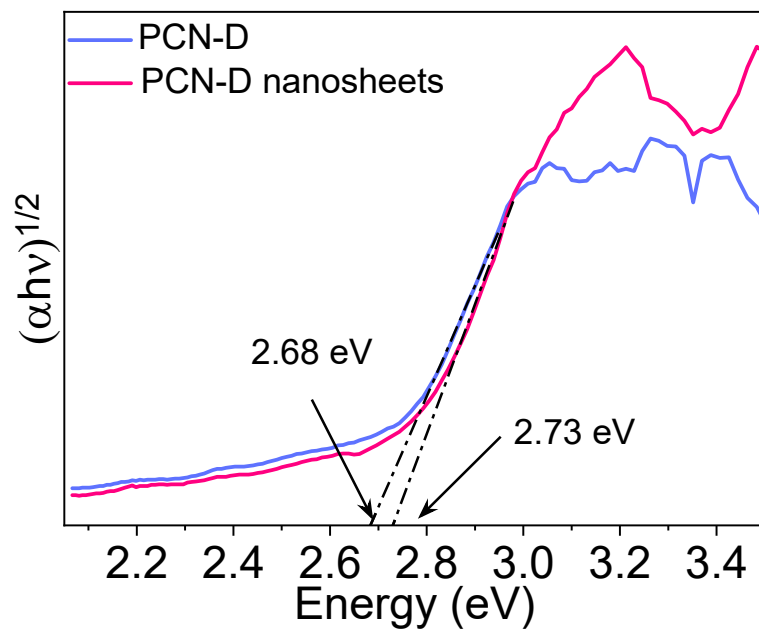

**Figure S23.** Band gap energies of PCN-D and PCN-D nanosheets.

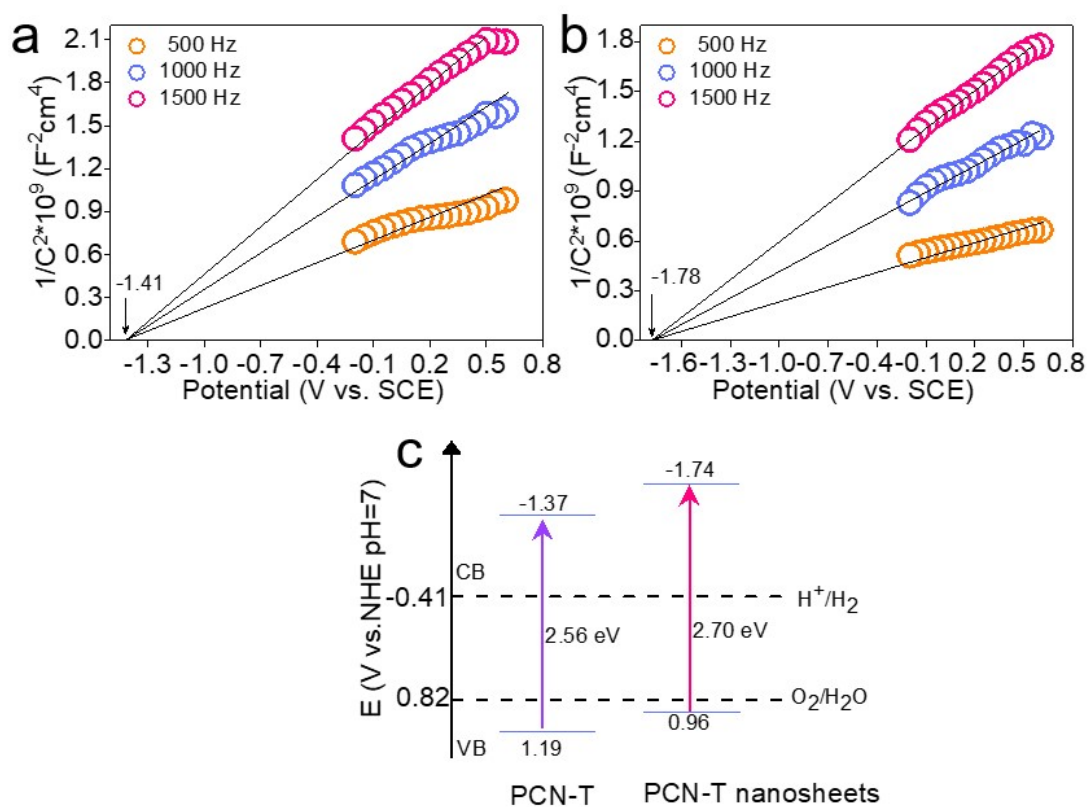

**Figure S24.** Mott–Schottky plots of (a) PCN-T and (b) PCN-T nanosheets. (c) Band alignments of PCN-T and PCN-T nanosheets.

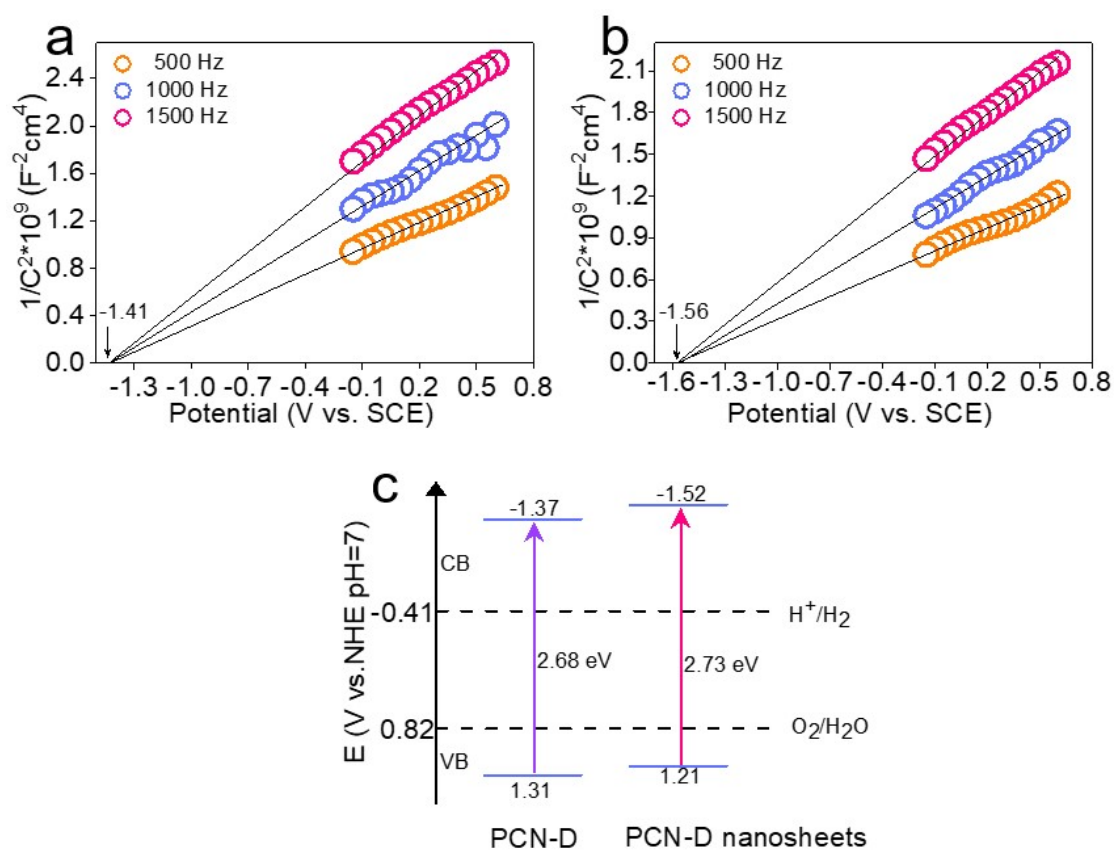

**Figure S25.** Mott-Schottky plots of (a) PCN-D and (b) PCN-D nanosheets. (c) Band alignments of PCN-D and PCN-D nanosheets.

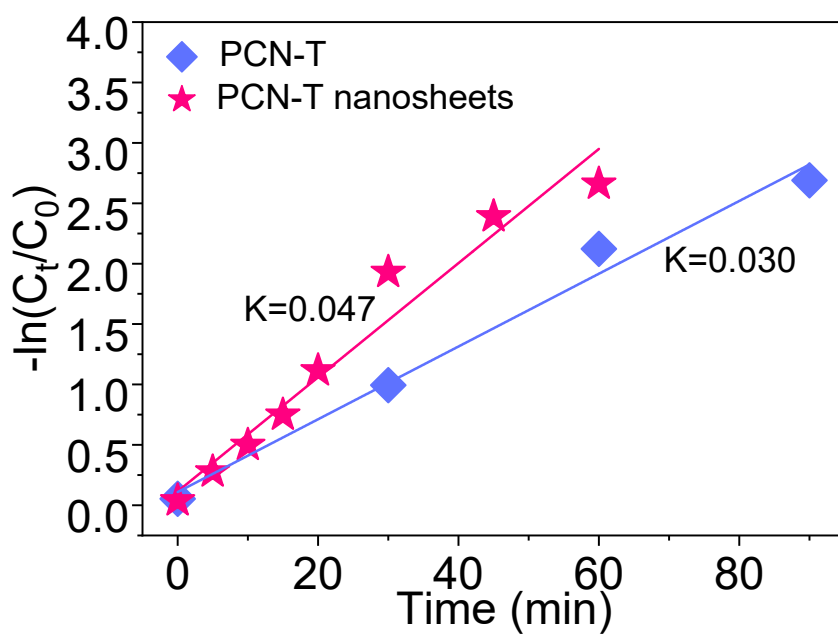

**Figure S26.** Comparison of the degradation rates of PCN-T and PCN-T nanosheets.

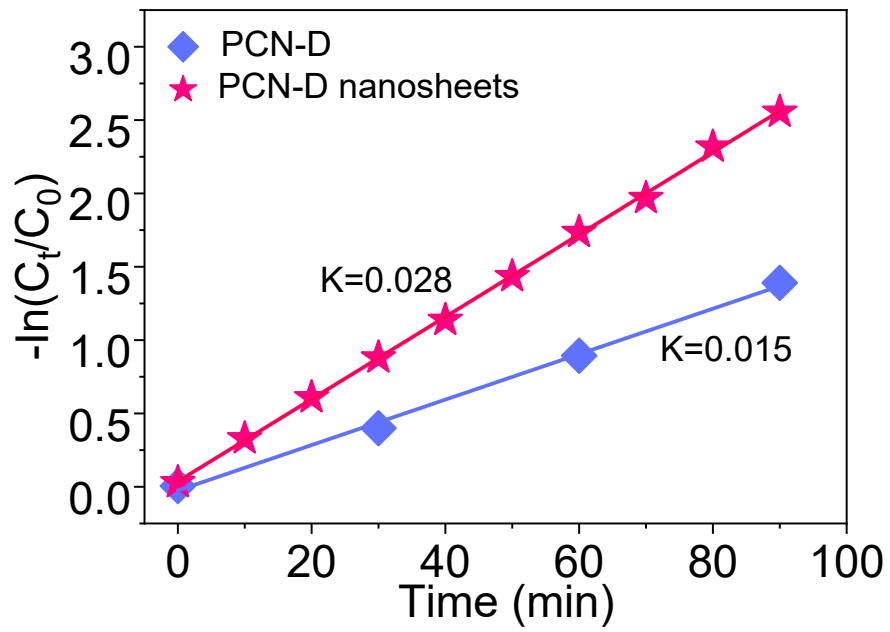

**Figure S27.** Comparison of the degradation rates of PCN-D and PCN-D nanosheets.

**Table S1.** The BET data of all samples.

| Samples          | BET surface areas (m <sup>2</sup> /g) |
|------------------|---------------------------------------|
| PCN              | 8.6                                   |
| PCN nanosheets   | 177.0                                 |
| PCN-T            | 59.9                                  |
| PCN-T nanosheets | 106.2                                 |
| PCN-D            | 5.0                                   |
| PCN-D nanosheets | 25.6                                  |

**Table S2.** The atom percentage of C, N and O atoms in the PCN and PCN nanosheets samples

determined by XPS.

| Samples        | C (at%) | N (at%) | O (at%) | C/N (at%) |
|----------------|---------|---------|---------|-----------|
| PCN            | 45.94   | 50.18   | 3.88    | 0.916     |
| PCN nanosheets | 42.96   | 53.68   | 3.36    | 0.800     |



**Table S3.** The peaks area ratios of C-N=C/H-N=C, N-(C)<sub>3</sub> and C-NH<sub>x</sub> of PCN and PCN nanosheets.

| Samples        | C-N=C/H-N=C (%) | N-C <sub>3</sub> (%) | C-NH <sub>x</sub> (%) |
|----------------|-----------------|----------------------|-----------------------|
| PCN            | 75.2            | 15.6                 | 9.2                   |
| PCN nanosheets | 76.2            | 13.5                 | 10.3                  |

**Table S4.** The atom percentage of C, N, O and H atoms in the PCN and PCN nanosheets samples determined by EA.

| Samples        | C (at%) | N (at%) | O (at%) | H (at%) | C/N (at%) |
|----------------|---------|---------|---------|---------|-----------|
| PCN            | 30.3    | 46.0    | 4.3     | 19.4    | 0.659     |
| PCN nanosheets | 29.5    | 44.9    | 3.9     | 21.7    | 0.657     |

**Table S5.** Comparison of typical PCN photocatalysts reported for hydrogen production and the corresponding quantum yields.

| Photocatalyst      | light source(nm)                                      | HER rate<br>( $\mu\text{mol/g/h}$ ) | AQY%           | Ref.             |
|--------------------|-------------------------------------------------------|-------------------------------------|----------------|------------------|
| PCN nanosheets     | 50w LED light (400nm)                                 |                                     | 16.22 (400nm)  | <b>This work</b> |
|                    | 50w LED light (420nm)                                 | 4020                                | 7.96 (420nm)   | <b>This work</b> |
| PCN-T nanosheets   | 50w LED light (400nm)                                 |                                     | 28.77 (400nm)  | <b>This work</b> |
|                    | 50w LED light (420nm)                                 | 11010                               | 21.38 (420nm)  | <b>This work</b> |
| PyP2/CN            | 300 W Xe lamp<br>( $\lambda \geq 420 \text{ nm}$ )    | 600                                 | 3.75 (420nm)   | 1                |
| COC30              | 300 W Xe lamp<br>( $\lambda \geq 420 \text{ nm}$ )    | 1336                                | 8.41 (420 nm)  | 2                |
| CN-10              | 300 W Xe lamp<br>( $\lambda \geq 400 \text{ nm}$ )    | 459                                 | 2.2 (420 nm)   | 3                |
| p-CN2              | 300 W Xe lamp<br>( $\lambda > 420 \text{ nm}$ )       | 396                                 | 0.79 (420 nm)  | 4                |
| CN-UNS             | 300 W Xe lamp<br>( $\lambda \geq 420 \text{ nm}$ )    | 5740                                | 14.49 (420 nm) | 5                |
| DTLP-CN            | 500 W Xe lamp<br>( $\lambda \geq 420 \text{ nm}$ )    | 1557                                | 11.2 (420 nm)  | 6                |
| GCN                | 300 W Xe lamp(AM 1.5 filter)                          | 9904                                | 10.3 (380 nm)  | 7                |
| HCN-NEA            | 300 W Xenon lamp<br>( $\lambda \geq 420 \text{ nm}$ ) | 4092                                | 7.87 (420nm)   | 8                |
| 3CuL/PCN           | 300 W Xenon lamp<br>( $\lambda > 420 \text{ nm}$ )    | 795                                 | 2.49 (420 nm)  | 9                |
|                    |                                                       |                                     | 2.50 (405 nm)  |                  |
| D-CCN              | monochromatic LED lamps                               | 1280                                | 3.40 (420 nm)  | 10               |
|                    |                                                       |                                     | 5.70 (450 nm)  |                  |
|                    |                                                       |                                     | 1.10 (405 nm)  |                  |
| m-PCN <sub>1</sub> | monochromatic LED lamps                               | 604                                 | 0.75 (420 nm)  | 11               |
|                    |                                                       |                                     | 0.22 (450 nm)  |                  |
| m-CNNS             | monochromatic LED lamps                               | 2600                                | 8.10 (420 nm)  | 12               |
| CN aerogels        | monochromatic LED lamps                               | 600                                 | 3.10 (420 nm)  | 13               |
| PCN-U nanosheets   | monochromatic LED lamps                               | 3390                                | 11.3 (405 nm)  | 14               |

**Table S6.** Bader charge analysis located in the Pt/PCN interface. The value was obtained by the difference between the number of valence electrons and calculated Bader charge results for each atom. The positive and negative values stand for, respectively, electron loss and accumulation. The net electronic charges transferred from the PCN to the Pt are -0.296 |e|.

| Atoms | 1       | 2       | 3       | 4       | 5       | 6       | 7       | 8       |
|-------|---------|---------|---------|---------|---------|---------|---------|---------|
| C     | 1.1778  | 0.9951  | 0.6410  | 0.9802  | -1.1340 | -0.7833 |         |         |
| N     | -0.8555 | -0.5948 | -0.6971 | 0.6410  | -0.7666 | -0.7764 | -0.7630 | -0.8835 |
| Pt    | -0.0782 | 0.0492  | 0.0109  | -0.0645 | -0.1104 | -0.1040 |         |         |

**Table S7.** Bader charge analysis located in the Pt/PCN-CVs interface. The value was obtained by the difference between the number of valence electrons and calculated Bader charge results for each atom. The positive and negative values stand for, respectively, electron loss and accumulation. The net electronic charges transferred from the PCN-CVs to the Pt are -0.44 |e|.

| Atoms | 1       | 2       | 3       | 4       | 5       | 6       |
|-------|---------|---------|---------|---------|---------|---------|
| C     | 1.2402  | 1.0256  | 0.7402  | 0.9481  |         |         |
| N     | -0.4820 | -0.7137 | -0.9387 | -0.4673 | -0.9902 | -0.3754 |
| Pt    | 0.1538  | 0.0427  | 0.0337  | -0.2941 | -0.1757 | -0.2006 |

**Table S8.** Free energy corrections for various reaction species.

| Species       | $E_{\text{DFT}}$ (eV) | $E_{\text{ZPE}}$ (eV) | $\int \text{CpdT}$ (eV) | -TS (eV) | G (eV)  |
|---------------|-----------------------|-----------------------|-------------------------|----------|---------|
| Pt/PCN        | -490.67               | 0.00                  | 0.09                    | 0.00     | -490.67 |
| Pt/PCN-H*     | -491.99               | 0.19                  | 0.10                    | -0.03    | -491.83 |
| PCN-CVs       | -485.62               | 0.00                  | 0.09                    | 0.00     | -485.62 |
| Pt/PCN-CVs-H* | -490.35               | 0.19                  | 0.10                    | -0.02    | -490.18 |

**Table S9.** Bader charge transfer of atoms located in the O<sub>2</sub>/PCN interface. The value was obtained by the difference between the number of valence electrons and calculated Bader charge results for each atom. The net electronic charges transferred from the PCN interface to the O<sub>2</sub> are -2.01 |e|.

| Atoms | 1      | 2      | 3      | 4      | 5      | 6      |
|-------|--------|--------|--------|--------|--------|--------|
| N     | -0.772 | -0.899 | -0.833 | -0.714 | -0.895 | -0.677 |
| C     | 2.087  | 2.047  | 1.961  | 2.139  | 1.910  | -2.015 |
| O     | -1.041 | -0.969 |        |        |        |        |

**Table S10.** Bader charge transfer of atoms located in the O<sub>2</sub>/PCN-CVs interface. The value was obtained by the difference between the number of valence electrons and calculated Bader charge results for each atom. The net electronic charges transferred from the PCN-CVs interface to the O<sub>2</sub> are -2.476 |e|.

| Atoms | 1      | 2      | 3      | 4      | 5      | 6      | 7      | 8      | 9      |
|-------|--------|--------|--------|--------|--------|--------|--------|--------|--------|
| N     | -0.752 | -0.116 | -0.731 | -0.632 | -0.527 | -0.879 | -0.822 | -0.863 | -0.602 |
| C     | 2.271  | 1.959  | 1.992  | 2.249  | 1.864  |        |        |        |        |
| O     | -1.157 | -1.320 |        |        |        |        |        |        |        |



**Table S11.** The atom percentage of C, N and O atoms in the PCN-T, PCN-T nanosheets, PCN-D and PCN-D nanosheets samples determined by XPS.

| Samples          | C (at%) | N (at%) | O (at%) | C/N (at%) |
|------------------|---------|---------|---------|-----------|
| PCN-T            | 49.19   | 46.42   | 4.40    | 1.06      |
| PCN-T nanosheets | 42.63   | 55.66   | 1.71    | 0.77      |
| PCN-D            | 48.11   | 47.79   | 4.11    | 1.01      |
| PCN-D nanosheets | 43.25   | 53.78   | 2.97    | 0.80      |

## References:

1. S. Zang, G. Zhang, P. Yang, D. Zheng and X. Wang, *Chem. Eur. J.*, 2019, 25, 6102-6107.
2. C. Yang, Z. Xue, J. Qin, M. Sawangphruk, X. Zhang and R. Liu, *Appl. Catal. B Environ.*, 2019, 259, 118094.
3. F. Yang, D. Liu, Y. Li, L. Cheng and J. Ye, *Appl. Catal. B Environ.*, 2019, 240, 64-71.
4. Y. Jiang, Z. Sun, C. Tang, Y. Zhou, L. Zeng and L. Huang, *Appl. Catal. B Environ.*, 2019, 240, 30-38.
5. Y. Zhang, Z. Huang, C.-L. Dong, J. Shi, C. Cheng, X. Guan, S. Zong, B. Luo, Z. Cheng, D. Wei, Y.-c. Huang, S. Shen and L. Guo, *Chem. Eng. J.*, 2022, 431, 134101.
6. Y. Huang, J. Liu, C. Zhao, X. Jia, M. Ma, Y. Qian, C. Yang, K. Liu, F. Tan, Z. Wang, X. Li, S. Qu and Z. Wang, *ACS Appl Mater Interfaces*, 2020, 12, 52603-52614.
7. W. Jiang, Y. Zhao, X. Zong, H. Nie, L. Niu, L. An, D. Qu, X. Wang, Z. Kang and Z. Sun, *Angew. Chem. Int. Ed.*, 2021, 60, 6124-6129.
8. Q. Liu, F. Wang, Y. Jiang, W. Chen, R. Zou, J. Ma, L. Zhong and X. Peng, *Carbon*, 2020, 170, 199-212.
9. Y. Zhang, Q. Cao, X. Wu, Y. Xiao, A. Meng, Q. Zhang, Y. Yu and W.-D. Zhang, *Chem. Eur. J.*, 2022, 427, 132042.
10. W. Ren, J. Cheng, H. Ou, C. Huang, M. M. Titirici and X. Wang, *ChemSusChem*, 2019, 12, 3257-3262.
11. L. Yin, S. Wang, C. Yang, S. Lyu and X. Wang, *ChemSusChem*, 2019, 12, 3320-3325.
12. H. Ou, C. Tang, Y. Zhang, A. M. Asiri, M.-M. Titirici and X. Wang, *J. Catal.*, 2019, 375, 104-112.
13. H. Ou, P. Yang, L. Lin, M. Anpo and X. Wang, *Angew. Chem. Int. Ed.*, 2017, 56, 10905-10910.
14. P. Yang, H. Ou, Y. Fang and X. Wang, *Angew. Chem. Int. Ed.*, 2017, 56, 3992-3996.
